# Supplementary material for: PGC-1α mediates a metabolic host defense response in human airway epithelium during rhinovirus infections
Source: PubMed Central journal article supplement (PMC8209127; doi:10.1038/s41467-021-23925-z), 2021-06-16
Supplement: 41467_2021_23925_MOESM1_ESM.pdf [file 41467_2021_23925_MOESM1_ESM.pdf]

## Supplementary Information

### **PGC-1 $\alpha$ mediates a metabolic host defense response in human airway epithelium during rhinovirus infections**

Aubrey N. Michi<sup>1,2</sup>, Bryan G. Yipp<sup>2,3</sup>, Antoine Dufour<sup>1,4</sup>, Fernando Lopes<sup>5,6</sup>, David Proud<sup>1,2\*</sup>

<sup>1</sup>Department of Physiology and Pharmacology, Cumming School of Medicine, University of Calgary, Calgary, AB, T2N 4N1 Canada

<sup>2</sup>Snyder Institute for Chronic Diseases, University of Calgary, Calgary, AB, T2N 4N1 Canada

<sup>3</sup>Department of Critical Care Medicine, Cumming School of Medicine, University of Calgary, Calgary, AB, T2N 4N1 Canada

<sup>4</sup>McCaig Institute for Bone and Joint Health, University of Calgary, Calgary, AB, T2N 4N1 Canada

<sup>5</sup>Institute of Parasitology, McGill University, Ste-Anne-de-Bellevue, QC, H9X 3V9, Canada

<sup>6</sup>Department of Microbiology and Immunology, McGill University, Montreal, QC, H3A 2B4, Canada

\*Correspondence: [dproud@ucalgary.ca](mailto:dproud@ucalgary.ca)

## Supplementary Figure 1

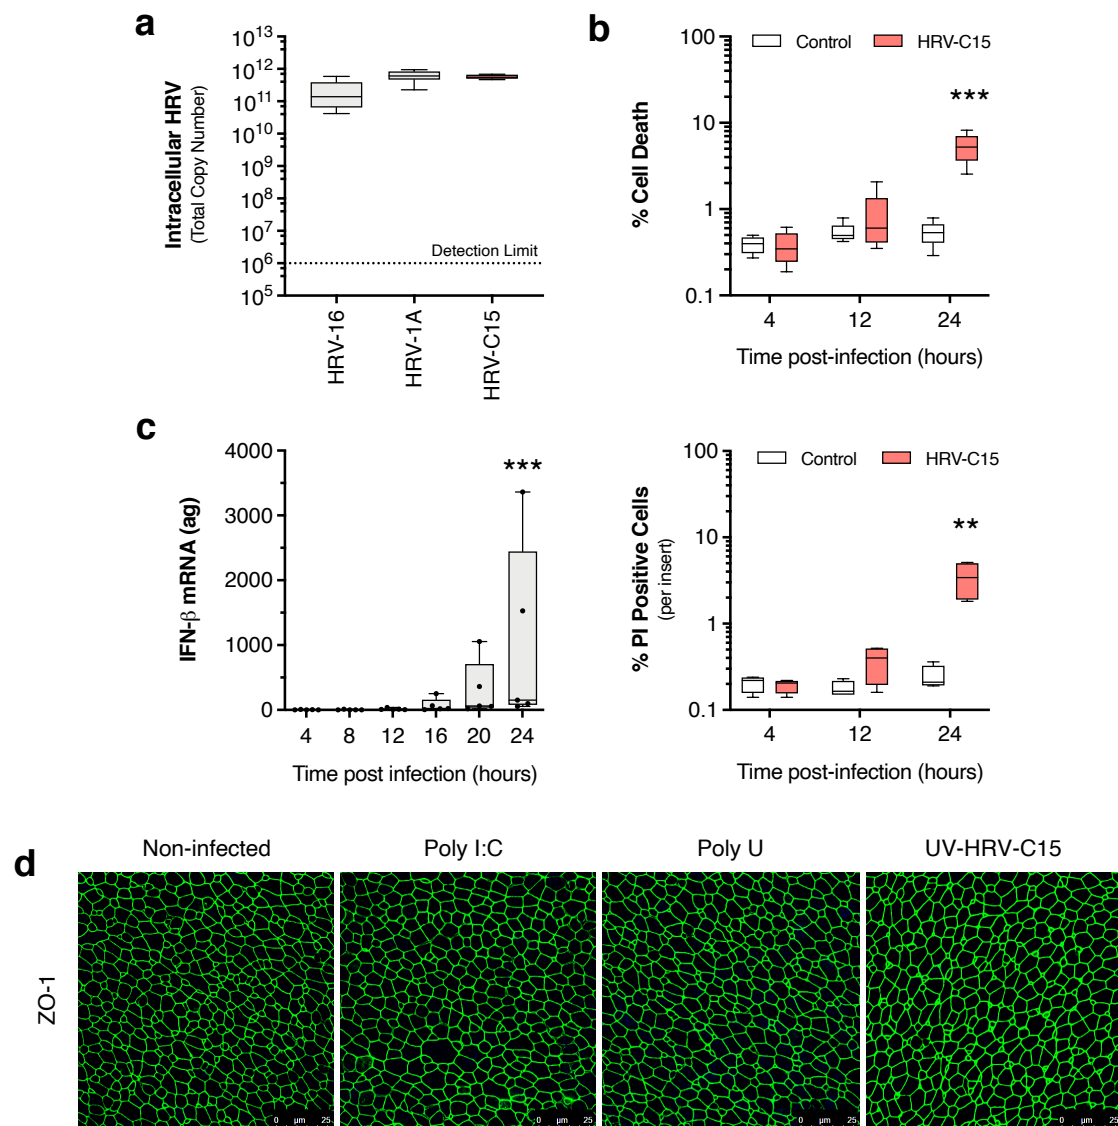

### Supplementary Figure 1. Effects of Live HRV-C15 Infection in ALI Cultures

**(a)** Matched intracellular HRV RNA copy number from HRV strain comparison in Figure 1b, quantified by RT-PCR. Dashed line represents RT-PCR detection limit. There was no detectable HRV in non-infected ALI cultures. Data represented as boxplots and analyzed by one-way ANOVA with Holm-Sidak multiple comparisons,  $n=6$  donors.

**(b)** Apical and basolateral release of lactate dehydrogenase (LDH) to assess necrosis compared to a fully lysed matched donor (top). *In situ* live cell propidium iodide (PI) staining in ALI cultures at each infection time point (bottom). Quantified by 10 fields of view per condition per time point per donor. Data represented as boxplots and analyzed by two-way ANOVA with Holm-Sidak multiple comparisons: LDH \*\*\* $p=0.0001$ , PI \*\* $p=0.0014$ ,  $n=5$  donors.

**(c)** Matched IFN- $\beta$  mRNA from Figure 1h, quantified by RT-PCR. Data represented as boxplots and analyzed by one-way ANOVA with Dunnett multiple comparisons: \*\* $p=0.003$ ,  $n=5$  donors.

**(d)** Representative immunofluorescence image of ZO-1 (green) organization from Figure 1c. Scale bar, 10  $\mu$ m. Data represented as boxplots indicate the median (center line), upper and lower box bounds (IQR = first and third quartiles), and whiskers (min and max values), with individual donor data points superimposed onto the boxplot.

# Supplementary Figure 2

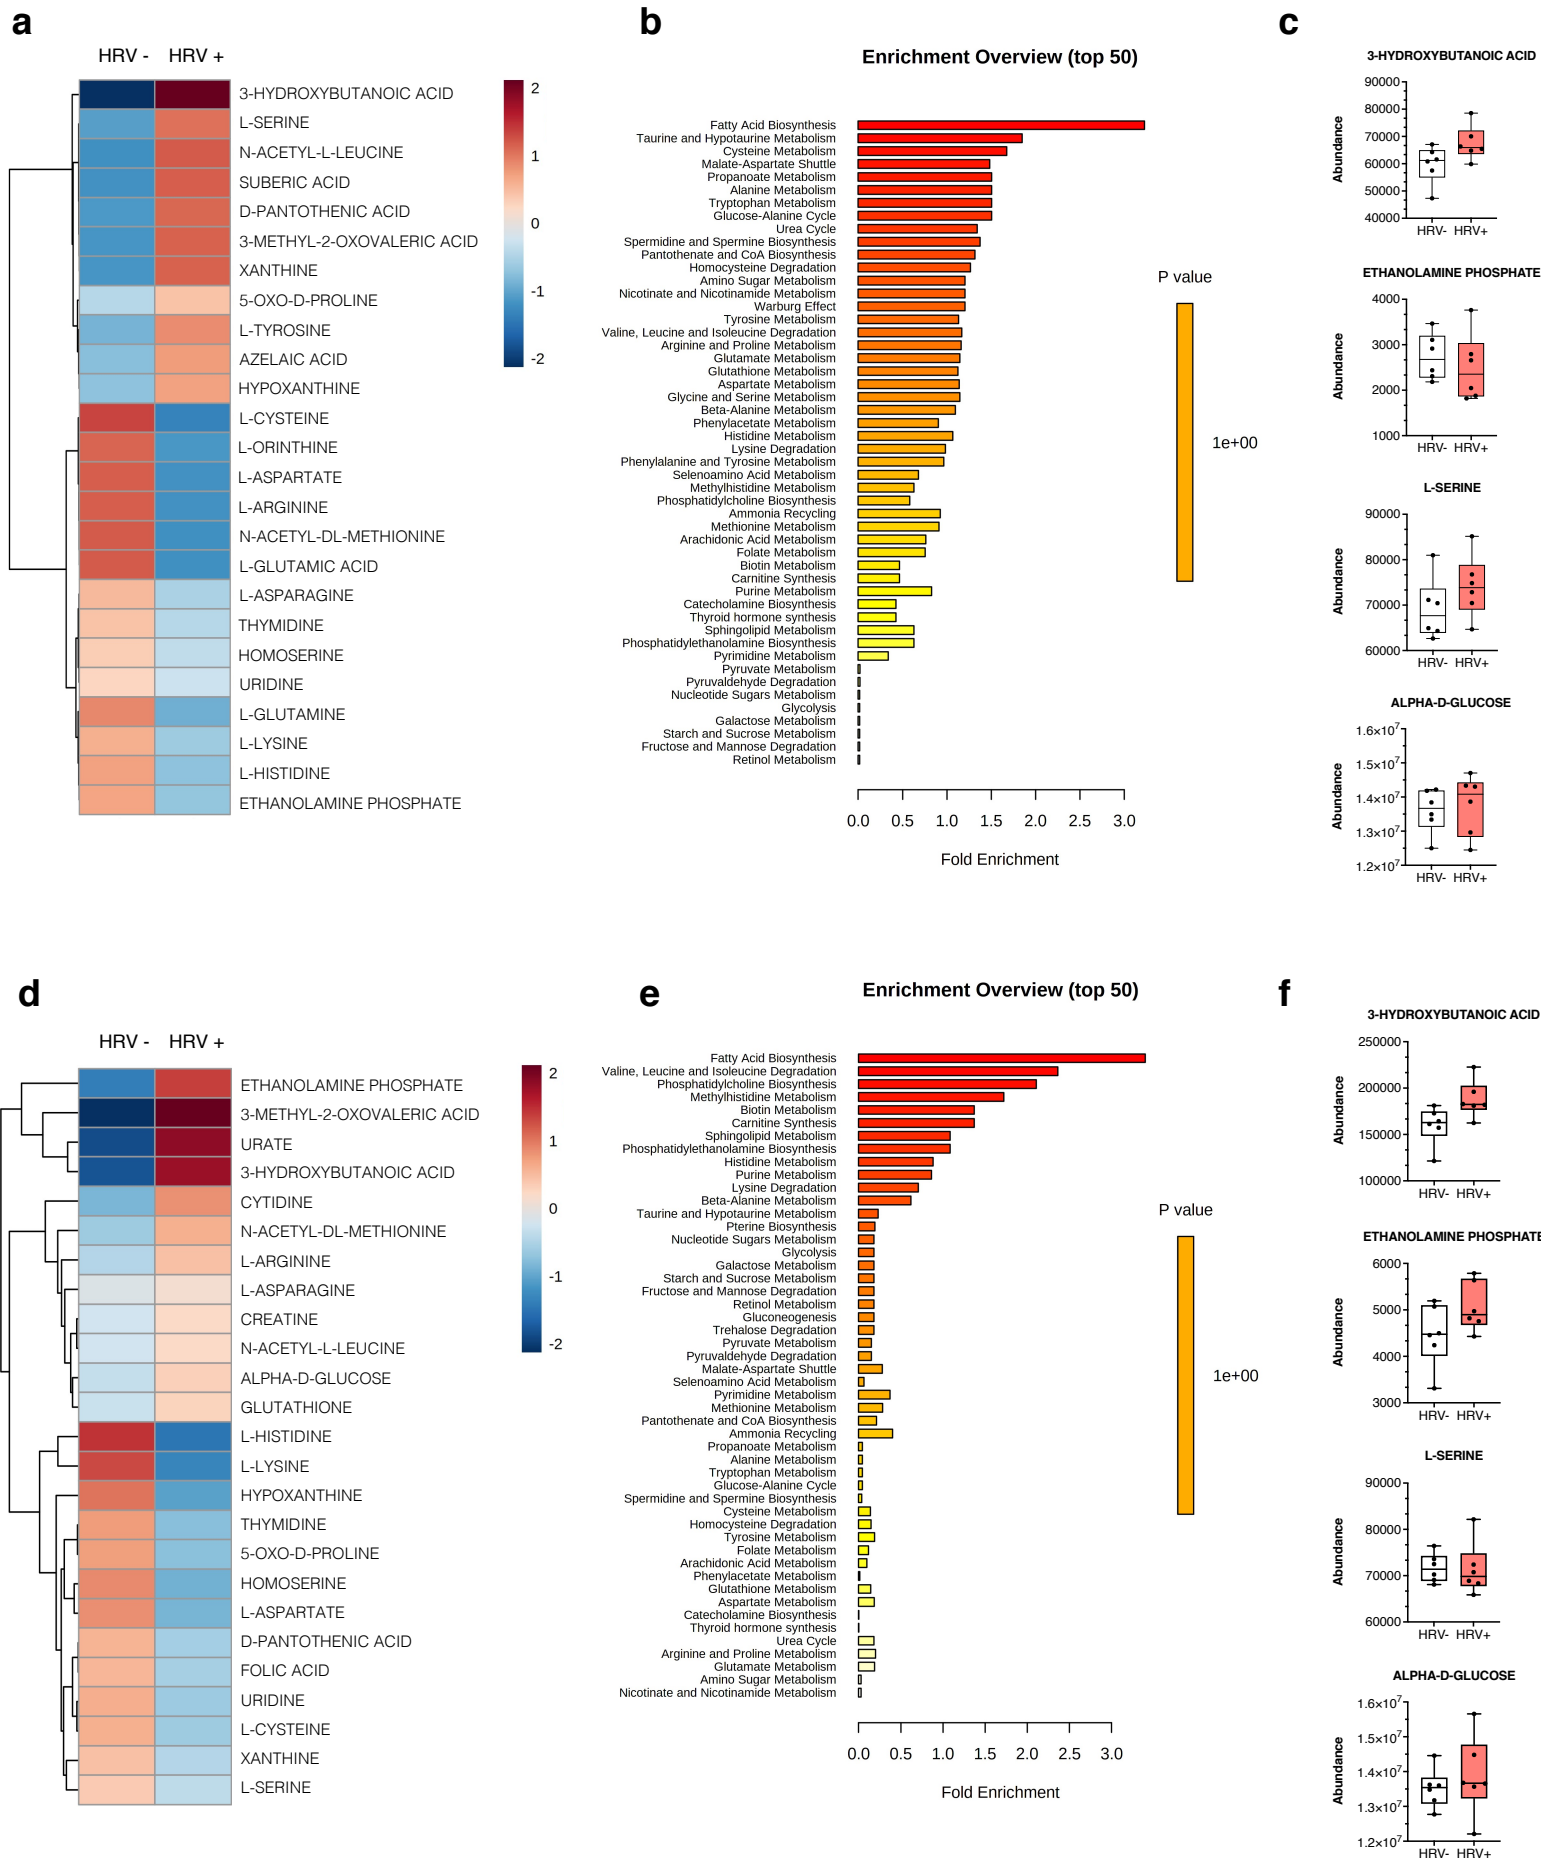

## Supplementary Figure 2. Early HRV-C15 Infection Metabolomic Analysis

**(a)** Hierarchical Clustering Heatmap depicting group averages of metabolite concentration (Top 25) of HRV-C15 (HRV+) and non-infected (HRV-) ALI cultures at 4 h post-infection normalized to HRV- group. Distance measure: Euclidean. Clustering Algorithm: Ward. n=6 donors.

**(b)** Enrichment analysis of upregulated metabolites computed by Hits/Expected, (hits = observed hits; expected = expected hits) of HRV-C15 (HRV+) and non-infected (HRV-) ALI cultures at 4 h post-infection normalized to HRV- group. Data analyzed by MetaboAnalyst 4.0, Small Molecule Pathway Database (SMPDB) metabolite set library, n=6 donors.

**(c)** 3-Hydroxybutanoic acid, ethanolamine phosphate, L-serine and alpha-D-glucose abundance at 4 h post-infection measured by LC-MS. Data represented as boxplots and analyzed by two-tailed paired *t* test. Data not significant n=6 donors.

**(d)** Hierarchical Clustering Heatmap depicting group averages of metabolite concentration (Top 25) of HRV-C15 (HRV+) and non-infected (HRV-) ALI cultures at 12 h post-infection normalized to HRV- group. Distance measure: Euclidean. Clustering Algorithm: Ward. n=6 donors.

**(e)** Enrichment analysis of upregulated metabolites computed by Hits/Expected, (hits = observed hits; expected = expected hits) of HRV-C15 (HRV+) and non-infected (HRV-) ALI cultures at 12 h post-infection normalized to HRV- group. Data analyzed by MetaboAnalyst 4.0, Small Molecule Pathway Database (SMPDB) metabolite set library, n=6 donors.

**(f)** 3-Hydroxybutanoic acid, ethanolamine phosphate, L-serine and alpha-D-glucose abundance at 12 h post-infection determined by LC-MS. Data represented as boxplots and analyzed by two-tailed paired *t* test. Data not significant, n=6 donors.

Data represented as boxplots indicate the median (center line), upper and lower box bounds (IQR = first and third quartiles), and whiskers (min and max values), with individual donor data points superimposed onto the boxplot.

## Supplementary Figure 3

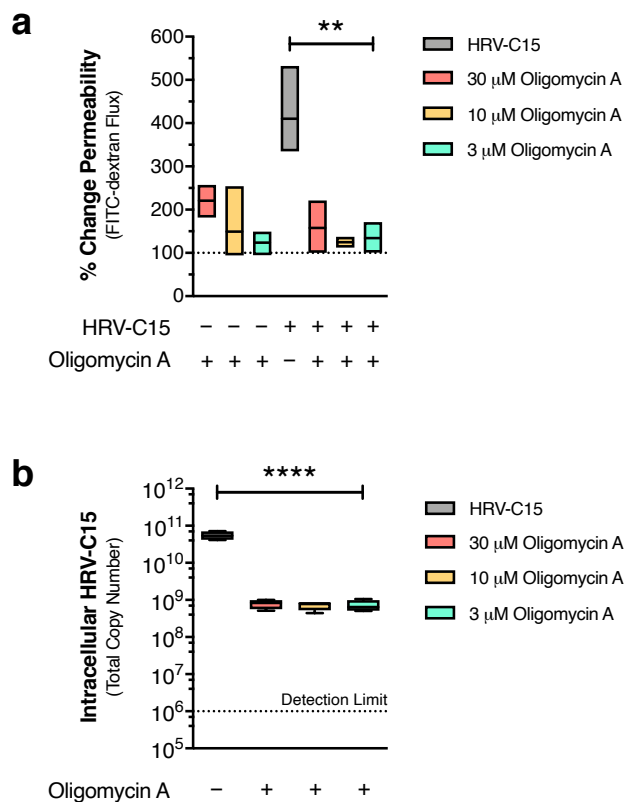

### Supplementary Figure 3. Effects of Oligomycin A on Barrier Function and HRV-C15 Titers

**(a)** Oligomycin A dose response measuring FITC-dextran permeability with and without HRV-C15 infection. Data represented as minimum to maximum floating bars indicating mean (center line) of percent change from non-infected control (dashed line). Data analyzed by one-way ANOVA with Holm-Sidak for multiple comparisons: \*\* $p=0.002$  for all comparisons to HRV-C15 alone,  $n=3$  donors.

**(b)** Matched intracellular HRV-C15 titer from Supplementary Figure 3a. Dashed line represents RT-PCR detection limit. There was no detectable HRV-C15 in non-infected cultures. Data represented as boxplots and analyzed by one-way ANOVA with Holm-Sidak for multiple comparisons: \*\*\*\* $p<0.0001$  for all comparisons to HRV-C15 alone,  $n=4$  donors.

Data represented as boxplots indicate the median (center line), upper and lower box bounds (IQR = first and third quartiles), and whiskers (min and max values).

## Supplementary Figure 4

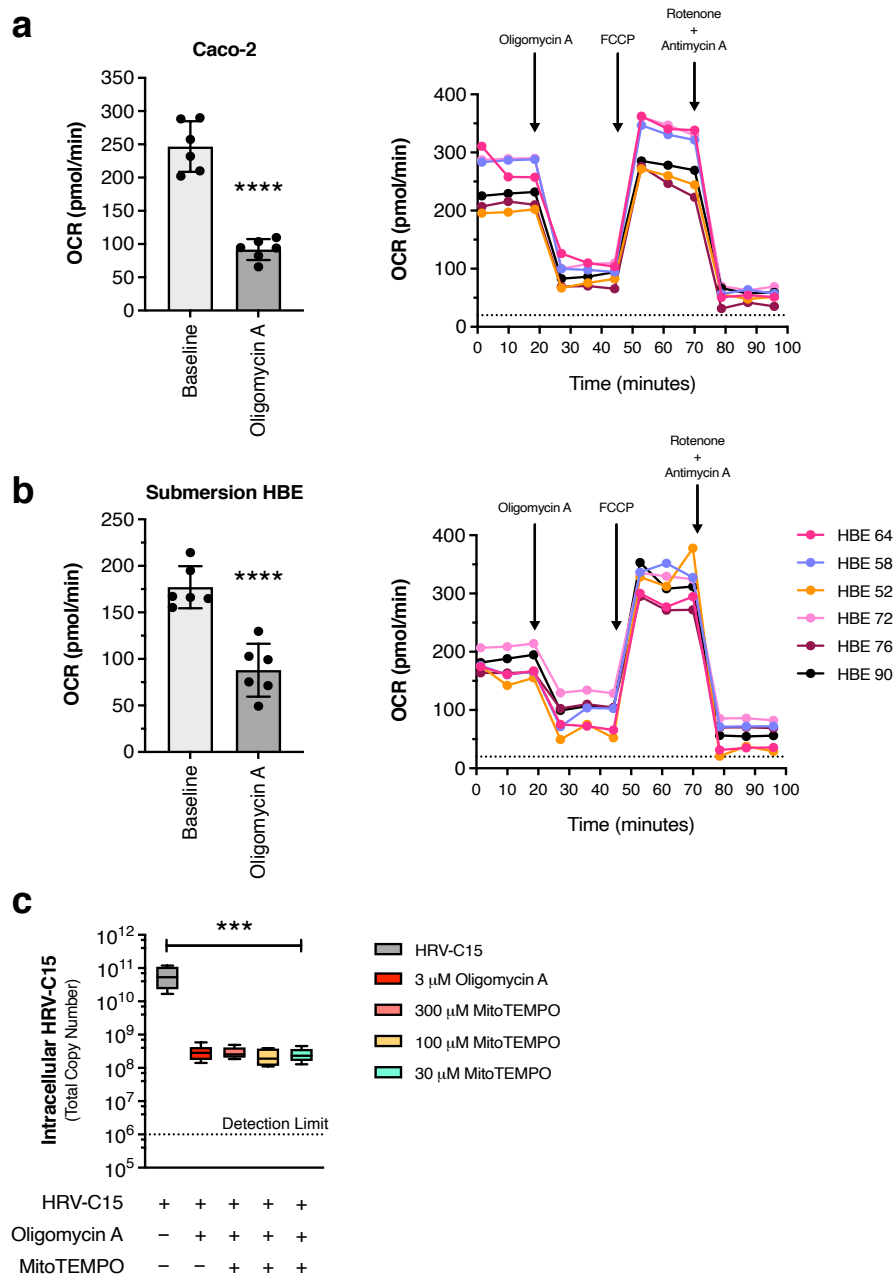

### Supplementary Figure 4. Oligomycin A Effect on Oxygen Consumption Rate in Other Epithelial Cell Models

**(a)** Caco-2 monolayer metabolic performance assessed by mitochondrial stress test in a Seahorse XFe24 Analyzer. Data represented (left) as mean  $\pm$  SD and matched biological replicate performance (right) and analyzed by two-tailed paired *t* test: \*\*\*\* $p < 0.0001$ ,  $n = 6$ .

**(b)** Non-differentiated primary human bronchial epithelial (HBE) monolayers (ALI progenitor cells) metabolic performance assessed by mitochondrial stress test in a Seahorse XFe24 Analyzer. Data represented (left) as mean  $\pm$  SD and matched individual donor performance (right) and analyzed by two-tailed paired *t* test: \*\*\*\* $p < 0.0001$ ,  $n = 6$  donors.

**(c)** Matched intracellular HRV-C15 RNA copy number from Figure 5d of MitoTEMPO dose response in combination with 3  $\mu$ M oligomycin A. Dashed line represents RT-PCR detection limit. There was no detectable HRV-C15 in non-infected ALI cultures. Data represented as boxplots and analyzed by one-way ANOVA with Holm-Sidak for multiple comparisons: \*\*\* $p = 0.0003$  for all comparisons to HRV-C15 alone,  $n = 6$  donors.

Data represented as boxplots indicate the median (center line), upper and lower box bounds (IQR = first and third quartiles), and whiskers (min and max values), with individual donor data points superimposed onto the boxplot.

## Supplementary Figure 5

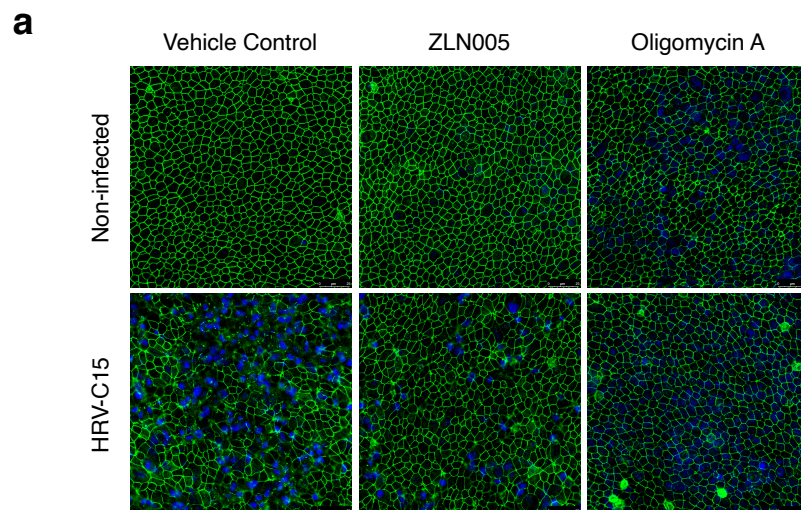

### Supplementary Figure 5. Tight Junction Organization Post-Metabolic Intervention at 24 hours

**(a)** Representative immunofluorescence images of occludin (green) and nuclei (blue) matched from experiment in Figure 7d at 24 h post-infection. Representative confocal images were obtained from the same three independent experiments in Figure 7d performed using ALI cultures derived from three different lung donors and selected from 10 fields per condition per donor, n=3 donors. Scale bar, 25  $\mu\text{m}$ .

## Supplementary Table 1

| Donor ID | Age | Sex    | Ethnicity              | Cause of Death           |
|----------|-----|--------|------------------------|--------------------------|
| 32       | 20  | Male   | Caucasian              | Head Trauma              |
| 44       | 45  | Female | Caucasian              | Intracerebral Hemorrhage |
| 46       | 54  | Male   | Caucasian              | Head Trauma/Anoxia       |
| 52       | 20  | Male   | Caucasian              | Head Trauma              |
| 53       | 63  | Male   | Caucasian              | Intracerebral Hemorrhage |
| 55       | 62  | Female | Caucasian              | Intracerebral Hemorrhage |
| 58       | 13  | Male   | Caucasian              | Head Trauma              |
| 64       | 38  | Female | Caucasian              | Head Trauma              |
| 72       | 62  | Male   | Caucasian              | Intracerebral Hemorrhage |
| 74       | 22  | Male   | African American/Black | Head Trauma              |
| 76       | 17  | Female | Caucasian              | Asphyxiation             |
| 78       | 60  | Male   | Hispanic/Latino        | Head Trauma              |
| 82       | 42  | Male   | Caucasian              | Intracerebral Hemorrhage |
| 84       | 59  | Male   | Caucasian              | Head Trauma              |
| 85       | 62  | Female | Caucasian              | Intracerebral Hemorrhage |
| 86       | 33  | Male   | Caucasian              | Head Trauma              |
| 90       | 43  | Male   | African American/Black | Intracerebral Hemorrhage |
| 91       | 57  | Female | Caucasian              | Intracerebral Hemorrhage |
| 93       | 65  | Male   | Caucasian              | Intracerebral Hemorrhage |
| 97       | 32  | Male   | Caucasian              | Head Trauma              |
| 98       | 59  | Female | Caucasian              | Intracerebral Hemorrhage |

### Supplementary Table 1. Human Lung Donor Demographics

Bronchial epithelial cells were obtained from non-transplanted healthy human lungs and were used to generate all ALI cultures. Donors were non-smokers, had no known lung diseases, died of non-pulmonary causes, and had no pulmonary trauma. Donors of any age, sex and race were accepted provided they fulfilled these criteria. Each experimental replicate was performed using ALI cultures derived from one donor such that 1 donor = 1 biological replicate (n=1).



## Supplementary Table 2

Supplementary Table 2. Primer and Probe Sequences

| Human Gene        | Forward Sequence<br>5' → 3'                                           | Reverse Sequence<br>5' → 3'                                                       | TaqMan Probe Sequence<br>(FAM/MGB)<br>5' → 3' |
|-------------------|-----------------------------------------------------------------------|-----------------------------------------------------------------------------------|-----------------------------------------------|
| <i>IFNL1</i>      | CACAGGAGCTAGCGAGCTTCA                                                 | TTTTCAGCTTGAGTGACTCTTCCA                                                          | AAGGCCAGGGACGC                                |
| <i>IFNB1</i>      | GCAATTGAATGGGAGGCTTG                                                  | TCCTCAGGGATGTCAAAGTTCAT                                                           | TACTGCCTCAAGGACA                              |
| <i>RSAD2</i>      | CCTGCTTGGTGCCTGAATCT                                                  | GCGCATATATTCATCCAGAATAAGG                                                         | ACCAGAAGATGAAAGACT                            |
| <i>RHINOVIRUS</i> | F <sub>1</sub> : AGCCTGCGTGGCTGCC<br>F <sub>2</sub> : AGCCTGCGTGGCGGC | R <sub>1</sub> : ACACCCAAAGTAGTCGGTCCC<br>R <sub>2</sub> : ACACCCAAAGTAGTTGGTCCCA | TCCGGCCCCCTGAAT                               |
| <i>GAPDH</i>      | Proprietary: Hs99999905                                               |                                                                                   | 20X Gene Expression Kit                       |
| <i>SLC2A1</i>     | Proprietary: Hs00892681                                               |                                                                                   | 20X Gene Expression Kit                       |
| <i>HK1</i>        | Proprietary: Hs00175976                                               |                                                                                   | 20X Gene Expression Kit                       |
| <i>HK2</i>        | Proprietary: Hs00606086                                               |                                                                                   | 20X Gene Expression Kit                       |
| <i>TFAM</i>       | Proprietary: Hs00273372                                               |                                                                                   | 20X Gene Expression Kit                       |
| <i>POLG</i>       | Proprietary: Hs00160298                                               |                                                                                   | 20X Gene Expression Kit                       |
| <i>PPARGC1A</i>   | Proprietary: Hs00173304                                               |                                                                                   | 20X Gene Expression Kit                       |

# Supplementary Table 3

**Supplementary Table 3. Resources and Reagents**

| RESOURCE                                   | SUPPLIER                                                   | IDENTIFIER  |
|--------------------------------------------|------------------------------------------------------------|-------------|
| <b>ANTIBODIES</b>                          |                                                            |             |
| mouse anti-occludin                        | Invitrogen (Carlsbad, CA, USA)                             | 33-1500     |
| mouse anti-ZO-1                            | Invitrogen (Carlsbad, CA, USA)                             | 33-9100     |
| rabbit anti-ZO-1                           | Invitrogen (Carlsbad, CA, USA)                             | 40-2200     |
| mouse anti-dsRNA                           | Scicons (Budapest, Hungary)                                | J2-1504     |
| mouse anti- $\beta$ -tubulin               | MilliporeSigma (Burlington, MA, USA)                       | T0198       |
| rabbit anti- $\beta$ -tubulin              | Cell Signaling Technology (Danvers, MA, USA)               | 9F3         |
| rabbit anti-PGC-1 $\alpha$                 | Cell Signaling Technology (Danvers, MA, USA)               | 2178        |
| mouse anti-GAPDH                           | AbD Serotec                                                | MCA 4739    |
| goat anti-mouse IgG (H+L) (AlexaFluor488)  | Invitrogen (Carlsbad, CA, USA)                             | A11029      |
| goat anti-rabbit IgG (H+L) (AlexaFluor488) | Invitrogen (Carlsbad, CA, USA)                             | A11034      |
| goat anti-mouse IgG (H+L) (AlexaFluor647)  | Invitrogen (Carlsbad, CA, USA)                             | A32728      |
| HRP-linked anti-rabbit IgG                 | Cell Signaling Technology (Danvers, MA, USA)               | 7404        |
| HRP-linked goat anti-mouse IgG             | Jackson ImmunoResearch Laboratories (West Grove, USA)      | 115-035-003 |
| Biotinylated horse anti-mouse IgG          | Vector Laboratories (Burlingame, CA, USA)                  | PK-4002     |
| <b>CELL CULTURE REAGENTS</b>               |                                                            |             |
| Pronase                                    | MilliporeSigma (Burlington, MA, USA)                       | 53702       |
| T75 cm <sup>2</sup> tissue culture flask   | Corning (Corning, NY, USA)                                 | 430641U     |
| PneumaCult-EX Basal Medium                 | StemCell Technologies (Vancouver, BC, Canada)              | 05009       |
| 50X Supplement                             | StemCell Technologies (Vancouver, BC, Canada)              | 05019       |
| hydrocortisone                             | StemCell Technologies (Vancouver, BC, Canada)              | 07904       |
| Fluconazole                                | MilliporeSigma (Burlington, MA, USA)                       | F8929       |
| Penicillin/Streptomycin                    | Life Technologies (Carlsbad, CA, USA)                      | 15140-122   |
| TrypLE Select                              | Life Technologies (Carlsbad, CA, USA)                      | 12563-011   |
| 12-well, 0.4 $\mu$ m Transwells            | Corning (Corning, NY, USA)                                 | 3460        |
| Bovine Collagen Type I/III                 | Advanced BioMatrix (San Diego, CA, USA)                    | 5005-B      |
| PneumaCult ALI-Basal Medium                | StemCell Technologies (Vancouver, BC, Canada)              | 05002       |
| 10X Supplement                             | StemCell Technologies (Vancouver, BC, Canada)              | 05003       |
| 100X Maintenance Supplement                | StemCell Technologies (Vancouver, BC, Canada)              | 05006       |
| 0.2 % heparin solution                     | StemCell Technologies (Vancouver, BC, Canada)              | 07980       |
| Dulbecco's PBS (DPBS)                      | Invitrogen (Carlsbad, CA, USA)                             | 14190-144   |
| HEPES (1 M)                                | Invitrogen (Carlsbad, CA, USA)                             | 15630-080   |
| F12                                        | Invitrogen (Carlsbad, CA, USA)                             | 11765-05    |
| DMEM                                       | Invitrogen (Carlsbad, CA, USA)                             | 11885-084   |
| Fetal Bovine Serum (FBS)                   | Invitrogen (Carlsbad, CA, USA)                             | 16000-044   |
| Seahorse XFe24 Flux Pak                    | Agilent Technologies (Santa Clara, CA, USA)                | 102340-100  |
| Seahorse XF DMEM Medium                    | Agilent Technologies (Santa Clara, CA, USA)                | 103575-100  |
| Seahorse XF 1 M Glucose Solution           | Agilent Technologies (Santa Clara, CA, USA)                | 103577-100  |
| Seahorse XF 100 mM Pyruvate Solution       | Agilent Technologies (Santa Clara, CA, USA)                | 103578-100  |
| Seahorse XF 200 mM Glutamine Solution      | Agilent Technologies (Santa Clara, CA, USA)                | 103579-100  |
| HBSS                                       | Invitrogen (Carlsbad, CA, USA)                             | 14175-095   |
| Gentamicin                                 | Invitrogen (Carlsbad, CA, USA)                             | 15750-060   |
| Leibovitz's L15                            | Invitrogen (Carlsbad, CA, USA)                             | 11415-064   |
| Dimethyl Sulfoxide (DMSO)                  | MilliporeSigma (Burlington, MA, USA)                       | D2650       |
| MEM non-essential amino acids              | Invitrogen (Carlsbad, CA, USA)                             | 11140-050   |
| L-glutamine                                | Invitrogen (Carlsbad, CA, USA)                             | 25030-081   |
| <b>CELL LINES</b>                          |                                                            |             |
| H1 HeLa                                    | American Type Culture Collection (Manassas, VA, USA)       | CRL-1958    |
| WI-38                                      | American Type Culture Collection (Manassas, VA, USA)       | CCL-75      |
| Caco-2                                     | American Type Culture Collection (Manassas, VA, USA)       | HTB-37      |
| <b>RHINOVIRUSES</b>                        |                                                            |             |
| HRV-16 (strain 11757)                      | American Type Culture Collection (Manassas, VA, USA)       | VR-283      |
| HRV-1A (strain 2060)                       | American Type Culture Collection (Manassas, VA, USA)       | VR-1559     |
| HRV-C15 (pC15-RZ)                          | Dr. James Gern (University of Wisconsin, Madison, WI, USA) | -           |

## Supplementary Table 3 (continued)

Supplementary Table 3. Resources and Reagents

| RESOURCE                                              | SUPPLIER                                            | IDENTIFIER         |
|-------------------------------------------------------|-----------------------------------------------------|--------------------|
| <b>COMMERCIAL ASSAYS</b>                              |                                                     |                    |
| CytoTox96 Non-Radioactive Cytotoxicity Assay          | Promega (Madison, WI, USA)                          | G1780              |
| BioRad DC Protein Assay                               | BioRad Laboratories (Mississauga, ON, Canada)       | 5000112            |
| QIAmp Viral RNA Mini Kit                              | Qiagen (Mississauga, ON, Canada)                    | 52904              |
| NucleoSpin RNA Kit                                    | Macherey-Nagel, GmbH & Co (Duren, Germany)          | 740955             |
| Mass Spectrometry Metabolite Library                  | IROA Technologies (Bolton, MA, USA)                 | MSMLS              |
| <b>REAGENTS AND CHEMICALS</b>                         |                                                     |                    |
| ZLN005                                                | Cayman Chemical (Ann Arbor, MI, USA)                | 14121              |
| SR18292                                               | Cayman Chemical (Ann Arbor, MI, USA)                | 22084              |
| Oligomycin A                                          | Tocris (Bristol, UK)                                | 4110               |
| 2-Deoxy-D-glucose (2-DG)                              | MilliporeSigma (Burlington, MA, USA)                | D8375              |
| MitoTEMPO                                             | Cayman Chemical                                     | 16621              |
| Paraformaldehyde, 16% w/v                             | Alfa Aesar (Haverhill, MA, USA)                     | 43368              |
| Bovine Serum Albumin (BSA)                            | MilliporeSigma (Burlington, MA, USA)                | A7906              |
| TritonX-100                                           | MilliporeSigma (Burlington, MA, USA)                | T9284              |
| Superfrost Plus, glass slides                         | VWR (Radnor, PA, USA)                               | 48311-703          |
| coverglass (24 x 50)                                  | ThermoFisher Scientific (Hampton, NH, USA)          | 12-545F            |
| FluorSave Mounting Reagent                            | MilliporeSigma (Burlington, MA, USA)                | 345789             |
| 4',6-diamidino-2'-phenylindole dihydrochloride (DAPI) | Invitrogen (Carlsbad, CA, USA)                      | D1306              |
| Methanol (MeOH)                                       | MilliporeSigma (Burlington, MA, USA)                | 34860              |
| <i>Bst</i> BI restriction enzyme                      | New England BioLabs (Ipswich, MA, USA)              | R0519L             |
| T7 RiboMAX Large Scale RNA System                     | Promega (Madison, WI, USA)                          | P1300              |
| Lipofectamine RNAiMax                                 | Invitrogen (Carlsbad, CA, USA)                      | 13778-150          |
| CellROX Green Reagent (488nm)                         | Invitrogen (Carlsbad, CA, USA)                      | C10444             |
| Hoechst 33342                                         | Invitrogen (Carlsbad, CA, USA)                      | H1399              |
| Propidium Iodide                                      | Invitrogen (Carlsbad, CA, USA)                      | P1304MP            |
| Avidin/Biotin Blocking Kit                            | Vector Laboratories (Burlingame, CA, USA)           | SP-2001            |
| VECTASTAIN ABC Peroxidase Kit                         | Vector Laboratories (Burlingame, CA, USA)           | PK4002             |
| 3,3'-diaminobenzidine (DAB)                           | Vector Laboratories (Burlingame, CA, USA)           | SK4100             |
| Gills II Hematoxylin                                  | Leica Biosystems (Wetzlar, Germany)                 | 3801522            |
| Permount                                              | Fischer Scientific (Waltham, MA, USA)               | SP15-500           |
| Pierce ECL Substrate                                  | Thermo Scientific (Waltham, MA, USA)                | 32106              |
| FastStart Universal Probe Master (ROX)                | Roche (Basel, Switzerland)                          | 4914058001         |
| Fluorescein Isothiocyanate (FITC)-dextran             | Sigma (St. Louis, MI, USA)                          | FD4                |
| TMTsixplex Isobaric Labeling Reagents                 | Thermo Scientific (Waltham, MA, USA)                | 90061              |
| 5X All-In-One RT MasterMix                            | Applied Biological Materials (Richmond, BC, Canada) | G490               |
| 10% Neutral Buffered Formalin (NBF)                   | MilliporeSigma (Burlington, MA, USA)                | R03379-82          |
| Surgipath cassettes                                   | Leica Biosystems (Wetzlar, Germany)                 | 3802631            |
| Paraplast (paraffin wax)                              | Leica Biosystems (Wetzlar, Germany)                 | 39601006           |
| SeaKem, GTG Agarose                                   | Lonza (Basel, Switzerland)                          | 50070              |
| Hydrogen peroxide (30% w/w)                           | MilliporeSigma (Burlington, MA, USA)                | H1009              |
| <b>EQUIPMENT</b>                                      |                                                     |                    |
| Q Exactive™ HF Hybrid Quadrupole-Orbitrap™ Mass Spec  | Thermo Scientific (Waltham, MA, USA)                | IQLAAEGAAPFALGMBFZ |
| Vanquish™ UHPLC System                                | Thermo Scientific (Waltham, MA, USA)                | IQLAAAGABHFAPUMZZZ |
| Synchronis™ HILIC UHPLC column                        | Thermo Scientific (Waltham, MA, USA)                | 97502-102130       |
| Orbitrap Fusion™ Lumos™ Tribrid™ Mass Spec            | Thermo Scientific (Waltham, MA, USA)                | IQLAAEGAAPFADMBHQ  |
| EASY-nLC™ 1200 System                                 | Thermo Scientific (Waltham, MA, USA)                | LC140              |
| PepMap RSLC C18 (75 μm x 50 cm)                       | Thermo Scientific (Waltham, MA, USA)                | ES803A             |
| Acclaim PepMap 100 (75 μm x 2 cm)                     | Thermo Scientific (Waltham, MA, USA)                | 164946             |
| Biopsy Punch                                          | Integra-Miltex Instruments (Princeton, NJ, USA)     | 33-33              |
| Leica TCS SP8                                         | Leica Microsystems (Wetzlar, Germany)               | TCS SP8            |
| 7500 Fast Real-Time PCR System                        | Applied Biosystems (Foster City, CA, USA)           | -                  |
| Sep-Pak C18                                           | Waters (Milford, MA, USA)                           | WAT020515          |
| EVOS XL Core Imaging System                           | Thermo Scientific (Waltham, MA, USA)                | AMEX1000           |
| EVOM Voltohmmeter                                     | Physiologic Instruments (San Diego, CA, USA)        |                    |
